# Supplementary material for: miR-22 targets YWHAZ to inhibit metastasis of hepatocellular carcinoma and its down-regulation predicts a poor survival
Source: PubMed Central journal article supplement (PMC5348352; doi:10.18632/oncotarget.13037), 2016-11-03
Supplement: oncotarget-07-80751-s001.pdf [file oncotarget-07-80751-s001.pdf]

## miR-22 targets YWHAZ to inhibit metastasis of hepatocellular carcinoma and its down-regulation predicts a poor survival

### Supplementary Materials

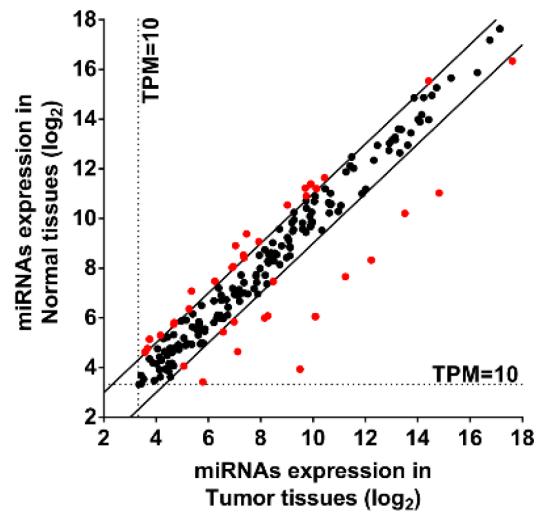

**Supplementary Figure S1:** Scatterplot depicts the miRNAs expression with an average of  $\geq 10$  TPM in tumor tissues and adjacent normal tissues of HCC patients. Red points represent the miRNAs either increased or decreased two times between adjacent normal tissues and tumor tissues.

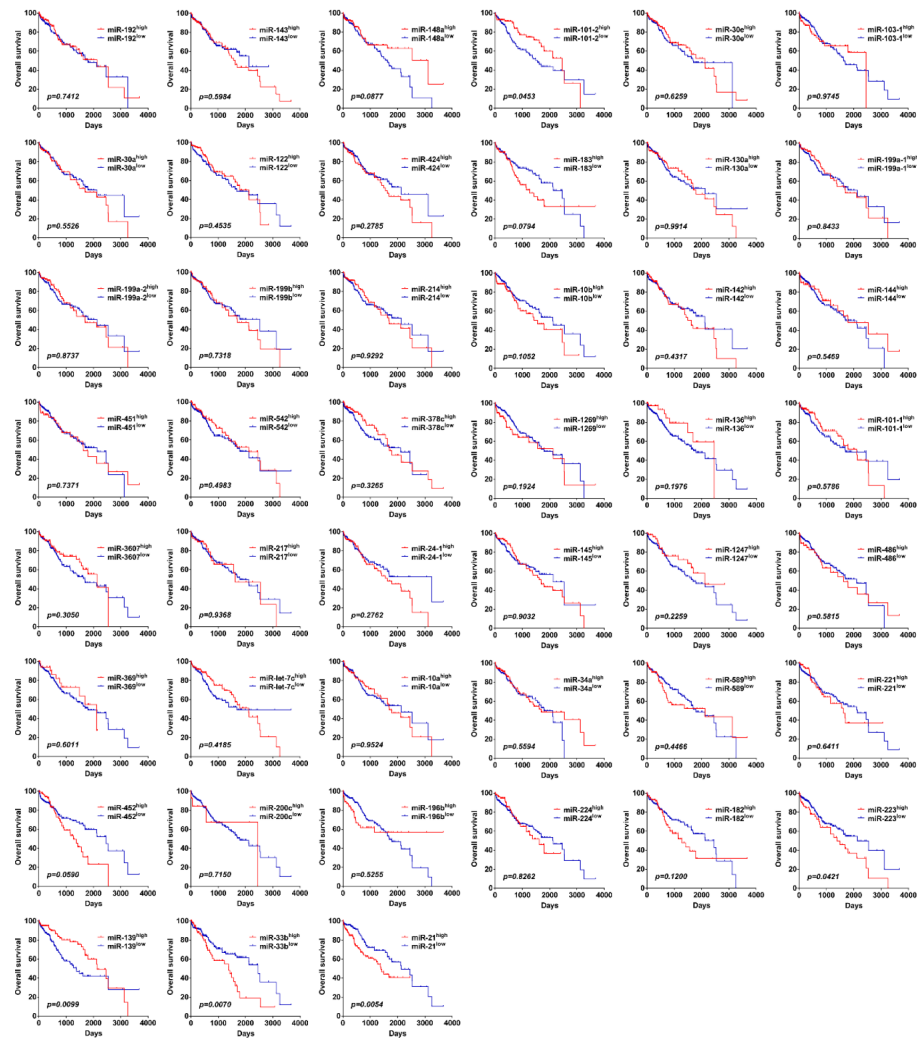

**Supplementary Figure S2: Kaplan-Meier curves for overall survival of 45 miRNAs.** These 45 miRNAs with an average of  $\geq 10$  TPM that either increased or decreased two times between adjacent normal tissues and tumor tissues, and also the the first 10 miRNAs according to the expression abundance either in adjacent normal tissues or tumor tissues was revealed by miRNA-seq data provided by TCGA.

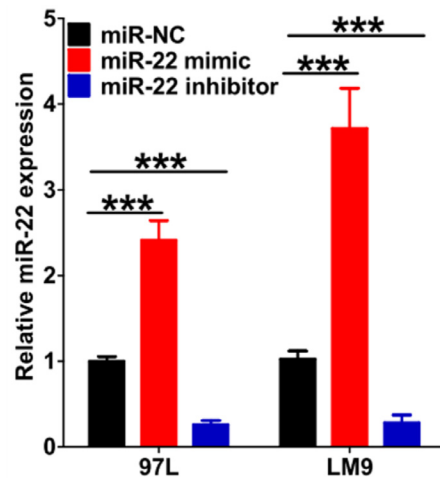

**Supplementary Figure S3: The interfering or overexpressing efficiency of miR-22 in HCC cells.** MHCC97L cells and HCCLM9 cells were transfected with miR-NC, miR-22 mimic or inhibitor, and miR-22 expression was determined by qRT-PCR 48 h after transfection.

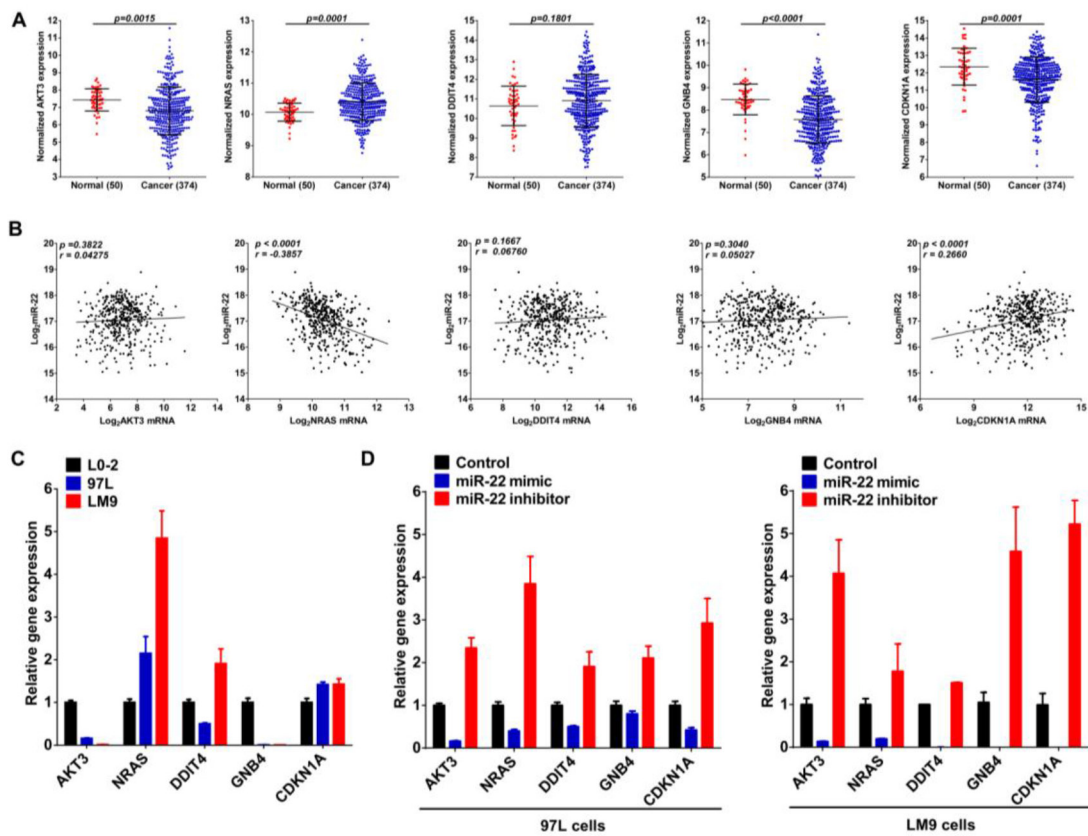

**Supplementary Figure S4: miR-22 regulates mRNAs expression in HCC cells.** (A) mRNA expression of AKT3, CDKN1A, DDIT4, GNB4 and NRAS in HCC patients. (B) Correlation between miR-22 and mRNA expression of these 6 transcripts. (C) mRNA expression of these 6 transcripts in L0-2, MHCC97L and HCCLM9 cells. (D) The effect of miR-22 on AKT3, CDKN1A, DDIT4, GNB4, NRAS and YWHAZ mRNA levels in MHCC97L (left panel) and HCCLM9 (right panel) cells was determined by qRT-PCR 48 h following transfection of the indicated cell line with negative control miRNA (control), miR-22 mimic or miR-22 inhibitor. Data are displayed as the Mean  $\pm$  SD of three independent experiments.

**Supplementary Table S1: Expression abundance of miRNAs in paired hepatocellular carcinoma tissues**

| miRNA         | Transcript per million (TPM) miRNA mapped (Mean $\pm$ SD) |      |                     |      | Mean fold change (tumor vs. normal) |
|---------------|-----------------------------------------------------------|------|---------------------|------|-------------------------------------|
|               | Tumor tissues (49)                                        | Rank | Normal tissues (49) | Rank |                                     |
| hsa-mir-21    | 202207 $\pm$ 114192                                       | (1)  | 82706 $\pm$ 37638   | (3)  | 2.4449                              |
| hsa-mir-22    | 144300 $\pm$ 76050                                        | (2)  | 203000 $\pm$ 45550  | (1)  | 0.7107                              |
| hsa-mir-148a  | 110675 $\pm$ 67282                                        | (3)  | 149113 $\pm$ 35268  | (2)  | 0.7422                              |
| hsa-mir-143   | 79766 $\pm$ 65259                                         | (4)  | 60230 $\pm$ 27823   | (4)  | 1.3244                              |
| hsa-mir-192   | 39722 $\pm$ 22367                                         | (5)  | 51650 $\pm$ 9228    | (5)  | 0.7691                              |
| hsa-mir-10b   | 28913 $\pm$ 29315                                         | (6)  | 2083 $\pm$ 2333     | (38) | 13.8785                             |
| hsa-mir-122   | 27119 $\pm$ 19460                                         | (7)  | 39548 $\pm$ 9369    | (7)  | 0.6857                              |
| hsa-mir-30a   | 23775 $\pm$ 29189                                         | (8)  | 31775 $\pm$ 4682    | (8)  | 0.7482                              |
| hsa-mir-101-1 | 21943 $\pm$ 12971                                         | (9)  | 47584 $\pm$ 11902   | (6)  | 0.4612                              |
| hsa-mir-103-1 | 21872 $\pm$ 9549                                          | (10) | 16166 $\pm$ 4951    | (13) | 1.3530                              |
| hsa-mir-30e   | 19253 $\pm$ 8643                                          | (11) | 29958 $\pm$ 6689    | (9)  | 0.6427                              |
| hsa-mir-10a   | 14869 $\pm$ 11767                                         | (15) | 29744 $\pm$ 10464   | (10) | 0.4999                              |

**Supplementary Table S2: Clinicopathological characteristics of HCC patients according to miRNAs expression**

|                         | miR-22<br>expression<br>(Mean ± SD) | <i>p</i> value | miR-9-1<br>expression<br>(Mean ± SD) | <i>p</i> value | miR-9-2<br>expression<br>(Mean ± SD) | <i>p</i> value |
|-------------------------|-------------------------------------|----------------|--------------------------------------|----------------|--------------------------------------|----------------|
| Age (years)             |                                     | 0.0080*        |                                      | 0.3620         |                                      | 0.3701         |
| ≥ 60                    | 17.06 ± 0.6626                      |                | 7.158 ± 2.222                        |                | 7.156 ± 2.224                        |                |
| < 60                    | 16.86 ± 0.7272                      |                | 6.947 ± 2.222                        |                | 6.948 ± 2.219                        |                |
| Gender                  |                                     | 0.4518         |                                      | 0.7340         |                                      | 0.7210         |
| Female                  | 16.93 ± 0.7025                      |                | 7.007 ± 2.069                        |                | 7.001 ± 2.081                        |                |
| Male                    | 16.99 ± 0.6985                      |                | 7.088 ± 2.296                        |                | 7.090 ± 2.290                        |                |
| Edmondson–Steiner grade |                                     | 0.0005*        |                                      | 0.0554         |                                      | 0.0507         |
| G1–2                    | 17.07 ± 0.7037                      |                | 6.890 ± 2.132                        |                | 6.886 ± 2.137                        |                |
| G3–4                    | 16.81 ± 0.6566                      |                | 7.349 ± 2.351                        |                | 7.354 ± 2.340                        |                |
| TNM stage               |                                     | 0.0003*        |                                      | 0.4892         |                                      | 0.4644         |
| I–II                    | 17.04 ± 0.6588                      |                | 7.023 ± 2.178                        |                | 7.019 ± 2.185                        |                |
| III–IV                  | 16.73 ± 0.7899                      |                | 7.212 ± 2.391                        |                | 7.220 ± 2.372                        |                |
| AFP level (ng/ml)       |                                     | < 0.0001*      |                                      | 0.6148         |                                      | 0.5929         |
| ≥ 400                   | 16.64 ± 0.6784                      |                | 7.125 ± 2.202                        |                | 7.127 ± 2.203                        |                |
| < 400                   | 17.15 ± 0.5975                      |                | 6.975 ± 2.076                        |                | 6.967 ± 2.082                        |                |
| Alcohol consumption     |                                     | 0.5456         |                                      | 0.9437         |                                      | 0.9318         |
| Yes                     | 17.03 ± 0.6900                      |                | 7.072 ± 2.145                        |                | 7.071 ± 2.153                        |                |
| No                      | 16.98 ± 0.6869                      |                | 7.055 ± 2.254                        |                | 7.050 ± 2.254                        |                |
| HBV/HCV infection       |                                     | 0.8287         |                                      | 0.0909         |                                      | 0.0926         |
| Yes                     | 16.98 ± 0.6468                      |                | 6.866 ± 2.097                        |                | 6.866 ± 2.093                        |                |
| No                      | 16.99 ± 0.7234                      |                | 7.270 ± 2.326                        |                | 7.268 ± 2.330                        |                |
| Vascular invasion       |                                     | 0.0448*        |                                      | 0.0061*        |                                      | 0.0065*        |
| None                    | 17.05 ± 0.6619                      |                | 6.710 ± 1.979                        |                | 6.709 ± 1.981                        |                |
| Micro/macro             | 16.89 ± 0.7315                      |                | 7.409 ± 2.441                        |                | 7.404 ± 2.445                        |                |

\**p* value less than 0.05 with significant difference between two groups.

**Supplementary Table S3: The potential miR-22 target genes predicted by KEGG pathway analysis**

| Term Id  | Term Name                               | Hit Genes                         | P-Value     | FDR      |
|----------|-----------------------------------------|-----------------------------------|-------------|----------|
| hsa05220 | Chronic myeloid leukemia                | AKT3,CDKN1A,MECOM,NRAS            | 0.000126007 | 0.005292 |
| hsa04012 | ErbB signaling pathway                  | AKT3,CDKN1A,ERBB3,NRAS            | 0.000248391 | 0.005216 |
| hsa04151 | PI3K-Akt signaling pathway              | AKT3,CDKN1A,DDIT4,GNB4,NRAS,YWHAZ | 0.00122297  | 0.017122 |
| hsa05214 | Glioma                                  | AKT3,CDKN1A,NRAS                  | 0.00141609  | 0.014869 |
| hsa05034 | Alcoholism                              | GNB4,H3F3B,H3F3C,NRAS             | 0.00152842  | 0.012839 |
| hsa05161 | Hepatitis B                             | AKT3,CDKN1A,NRAS,YWHAZ            | 0.00178071  | 0.012465 |
| hsa05218 | Melanoma                                | AKT3,CDKN1A,NRAS                  | 0.00199787  | 0.011987 |
| hsa04010 | MAPK signaling pathway                  | AKT3,MAX,MECOM,NRAS,SRF           | 0.00208565  | 0.01095  |
| hsa05202 | Transcriptional misregulation in cancer | CDKN1A,H3F3B,H3F3C,MAX            | 0.00276869  | 0.012921 |
| hsa05215 | Prostate cancer                         | AKT3,CDKN1A,NRAS                  | 0.00379561  | 0.015942 |
| hsa05203 | Viral carcinogenesis                    | CDKN1A,NRAS,SRF,YWHAZ             | 0.00440141  | 0.016805 |
| hsa05200 | Pathways in cancer                      | AKT3,CDKN1A,MAX,MECOM,NRAS        | 0.00581724  | 0.02036  |
| hsa04725 | Cholinergic synapse                     | AKT3,GNB4,NRAS                    | 0.00719472  | 0.023245 |
| hsa05205 | Proteoglycans in cancer                 | AKT3,CDKN1A,ERBB3,NRAS            | 0.00784687  | 0.023541 |
| hsa05219 | Bladder cancer                          | CDKN1A,NRAS                       | 0.00788671  | 0.022083 |
| hsa04110 | Cell cycle                              | CDKN1A,STAG2,YWHAZ                | 0.00950284  | 0.024945 |
| hsa05160 | Hepatitis C                             | AKT3,CDKN1A,NRAS                  | 0.0110268   | 0.027243 |
| hsa05166 | HTLV-I infection                        | AKT3,CDKN1A,NRAS,SRF              | 0.0139179   | 0.032475 |
| hsa05213 | Endometrial cancer                      | AKT3,NRAS                         | 0.0144148   | 0.031864 |
| hsa05223 | Non-small cell lung cancer              | AKT3,NRAS                         | 0.0154866   | 0.032522 |
| hsa05221 | Acute myeloid leukemia                  | AKT3,NRAS                         | 0.0171565   | 0.034313 |
| hsa04150 | mTOR signaling pathway                  | AKT3,DDIT4                        | 0.0188994   | 0.036081 |
| hsa05211 | Renal cell carcinoma                    | AKT3,NRAS                         | 0.0225979   | 0.041266 |
| hsa04370 | VEGF signaling pathway                  | AKT3,NRAS                         | 0.0225979   | 0.041266 |
| hsa04664 | Fc epsilon RI signaling pathway         | AKT3,NRAS                         | 0.0245502   | 0.041244 |
| hsa03018 | RNA degradation                         | BTG1,EDC3                         | 0.0258889   | 0.041821 |
| hsa04062 | Chemokine signaling pathway             | AKT3,GNB4,NRAS                    | 0.0277527   | 0.043171 |
| hsa04662 | B cell receptor signaling pathway       | AKT3,NRAS                         | 0.0293619   | 0.044043 |
| hsa05169 | Epstein-Barr virus infection            | AKT3,CDKN1A,YWHAZ                 | 0.0333773   | 0.04834  |

**Supplementary Table S4: Sequences of RT-PCR primers and luciferase assay**

| Gene                     | Forward primer/sequence (5'-3')                                                                    | Reverse primer/sequence (5'-3')                                         |
|--------------------------|----------------------------------------------------------------------------------------------------|-------------------------------------------------------------------------|
| AKT3                     | GTGTACCGTGATCTCAAGTTGG                                                                             | TTCATGGTGGCTGCATCTGT                                                    |
| CDKN1A                   | CAGACCAGCATGACAGATTC                                                                               | ATGTAGAGCGGGCCTTTGAG                                                    |
| DDIT4                    | GAGGAAGACACGGCTTACCTGG                                                                             | TAGTTCCTTTGCCACCTGGC                                                    |
| GNB4                     | CTGAGCTCCCTCCAGCTGTT                                                                               | GCCCCTCAGTGTACGTCTTG                                                    |
| NRAS                     | TGGAGCTTGAGGTTCTTGCT                                                                               | TCGCCTGTCCTCATGTATTGG                                                   |
| YWHAZ                    | GTCGATCAGTCACAACAAGCA                                                                              | CCGATGTCCACAATGTCAAGT                                                   |
| GAPDH                    | ACCACAGTCCATGCCATCAC                                                                               | TCCACCACCCTGTTGCTGTA                                                    |
| YWHAZ 3' UTR (Wild-type) | AAATAGCGGCCGCTTGAAATTTAT<br>TCCTTA <b><u>TTC</u></b> CCTCTT <b><u>GGCAGCT</u></b><br>AATGGGCTCTTAT | TTTATCGCCGGCGAACTTTAAATAA<br>GGAATAAGGGAGAACCGTCGATTAC<br>CCGAGAATAGATC |
| YWHAZ 3' UTR (Mutant)    | AAATAGCGGCCGCTTGAAATTTAT<br>CCTTA <b><u>TTC</u></b> CCTCTT <b><u>AGATCAG</u></b><br>AATGGGCTCTTAT  | TTTATCGCCGGCGAACTTTAAAT<br>AAGGAATAAGGGAGAATCTAGT<br>CTTACCCGAGAATAGATC |

Nucleotides in bold and underlined represent the putative miR-22 binding sequence.
